# Supplementary figures and images for: The hemicellulose extract from Cynara cardunculus: a source of value-added biomolecules produced by xylanolytic thermozymes
Source: Royal Society of Chemistry journal article supplement (doi:10.1039/c5gc02774h), 2015-12-09

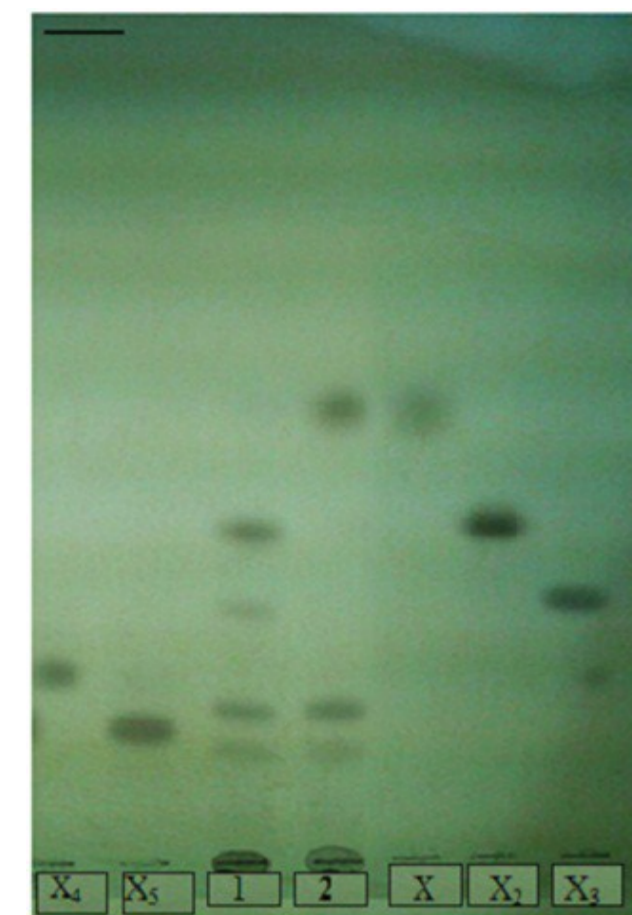

Supplement: c5gc02774h1.pdf [file c5gc02774h1.pdf]
